# Supplementary material for: Enhancing the corrosion resistance and surface bioactivity of a calcium-phosphate coating on a biodegradable AZ60 magnesium alloy via a simple fluorine post-treatment method
Source: Royal Society of Chemistry journal article supplement (doi:10.1039/c5ra10315k), 2015-01-01
Supplement: c5ra10315k1.pdf [file c5ra10315k1.pdf]

## Electronic Supporting Information (ESI):

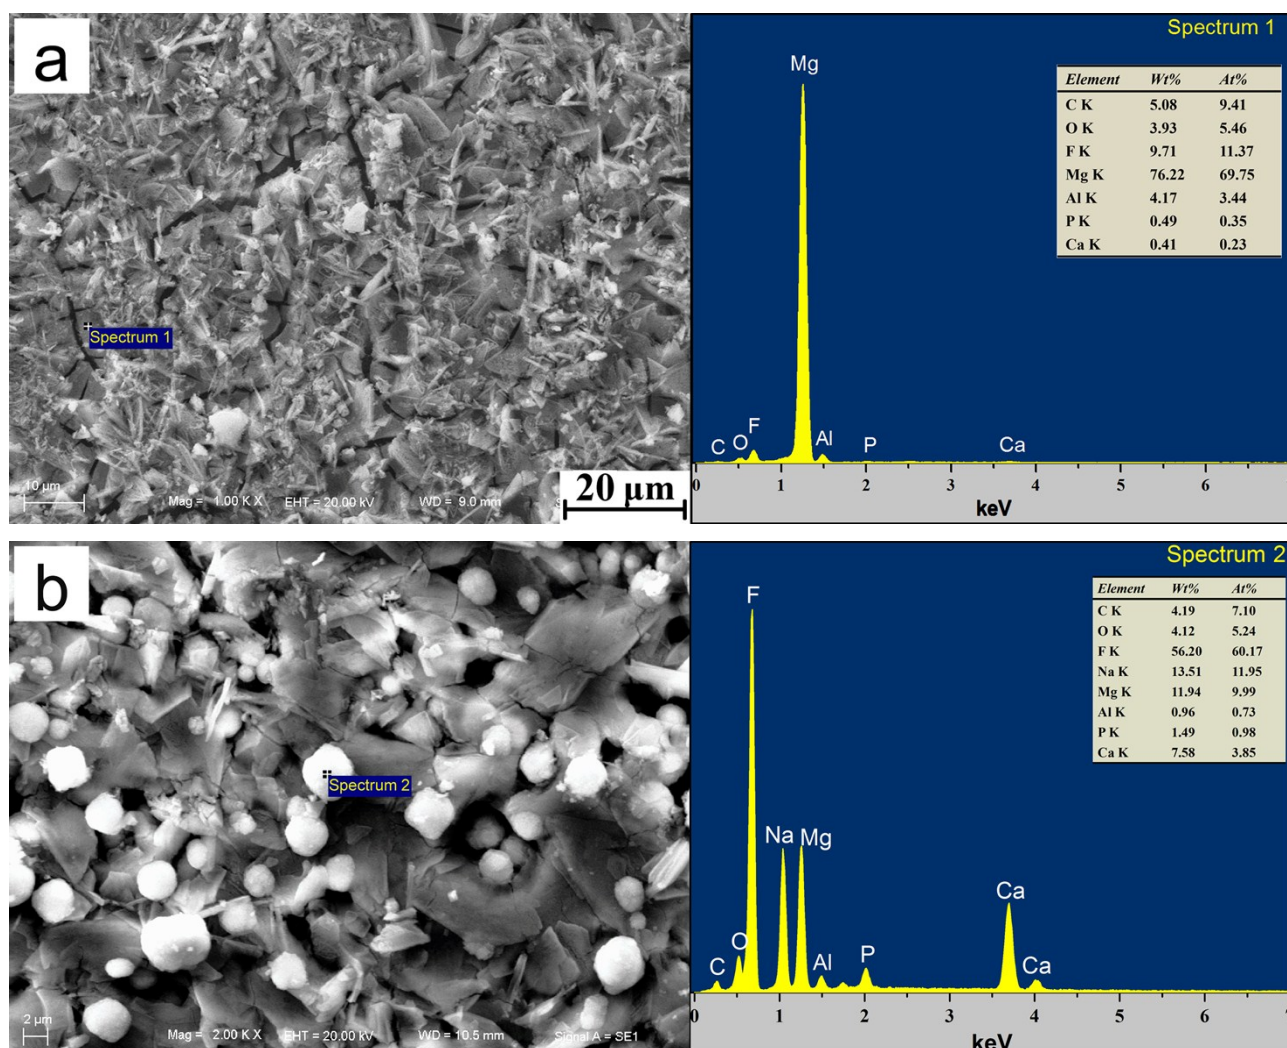

Fig. S1. Composition of the ball-like precipitate on the fluorine post-treated coating at pH=12 for 6h, examined by Energy dispersive X-ray spectroscopy (EDS).

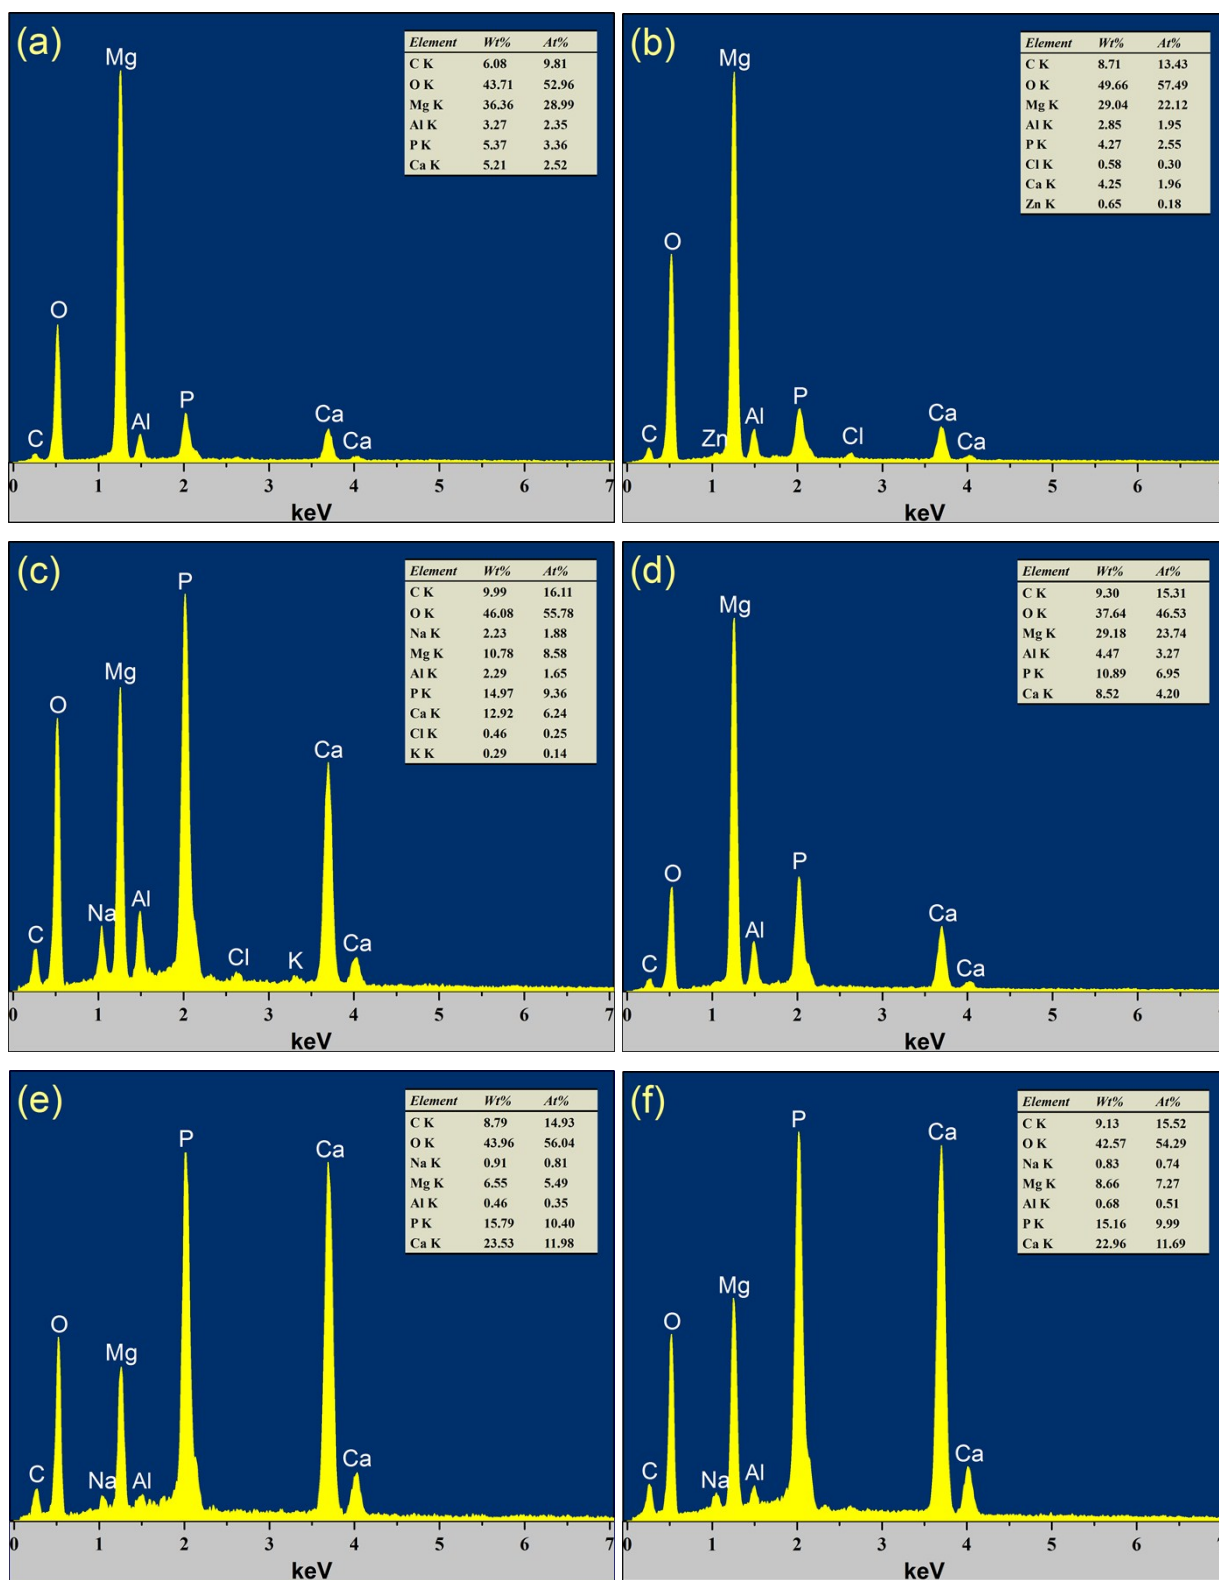

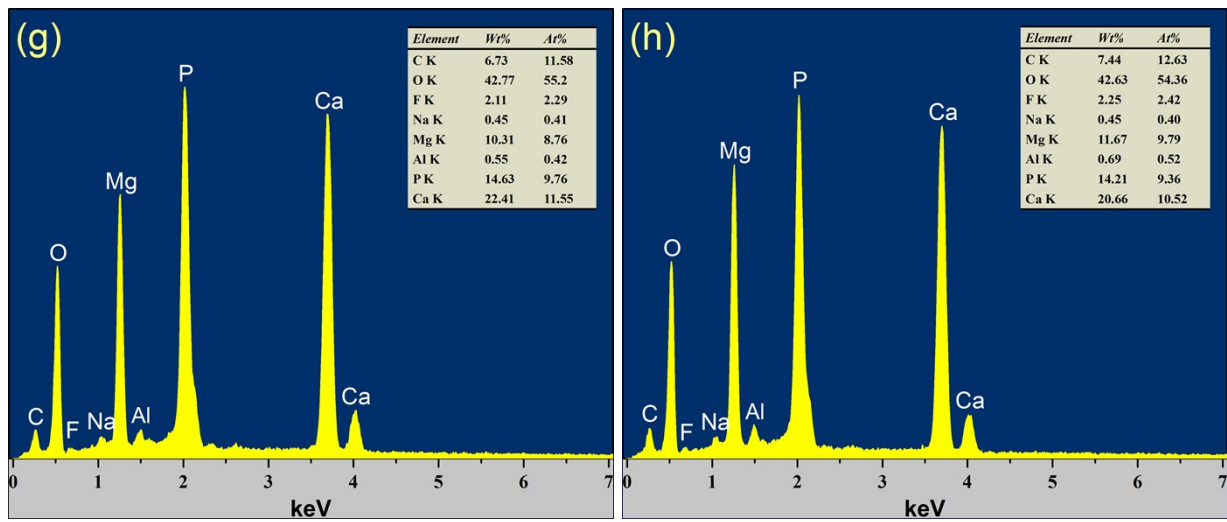

Fig. S2. EDS results of (a, b) the AZ60 alloy, (c, d) the CaP, (e, f) HA and (g, h) F-CaP coatings immersed in SBF for (a, c, e, g) 7 days and (b, d, f, h) 15 days.



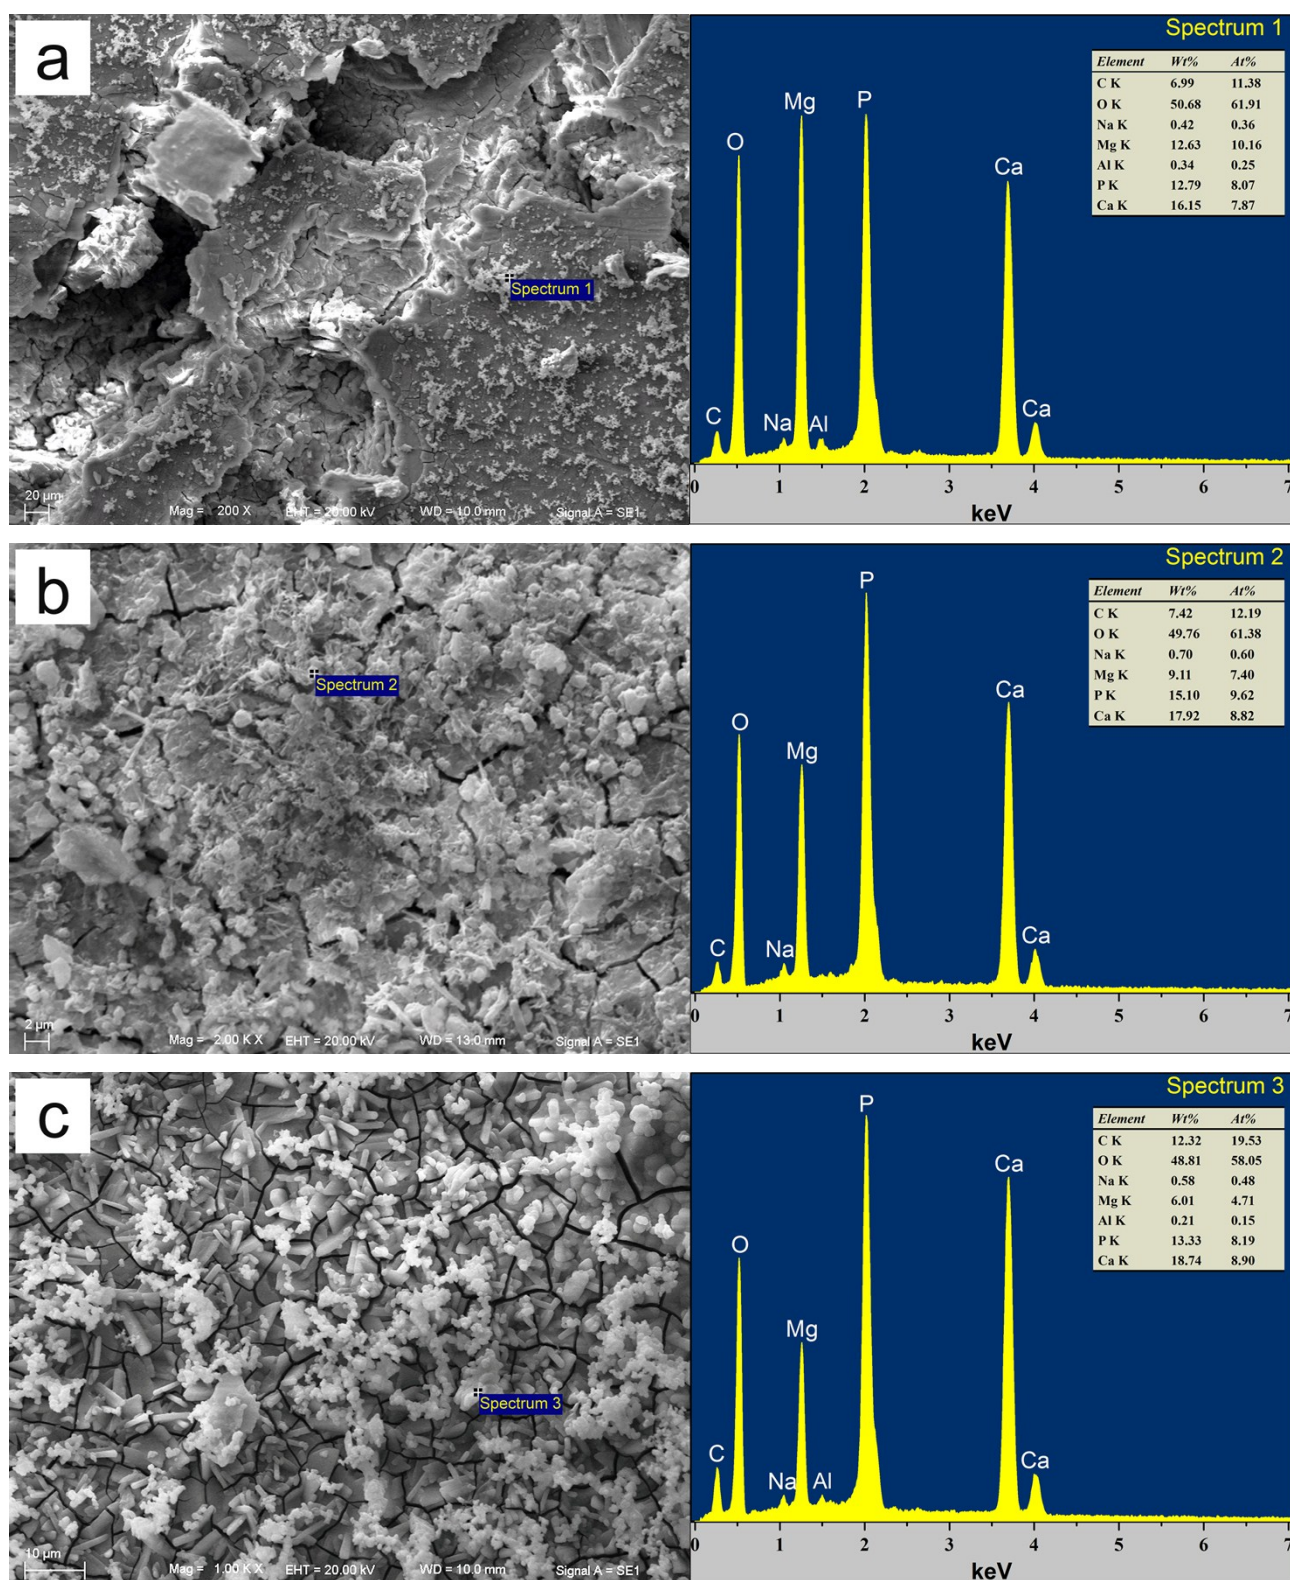

Fig. S3. Composition of the outer precipitates examined by EDS: (a) the AZ60 alloy, (b) the CaP and (c) the F-CaP coatings.
